# Supplementary material for: A Victorivirus and Two Novel Mitoviruses Co-Infected the Plant Pathogen Nigrospora oryzae
Source: Viruses. 2019 Jan 19;11(1):83. doi: 10.3390/v11010083 (PMC6356909; doi:10.3390/v11010083)
Supplement: Supplementary file 1 [file viruses-11-00083-s001.pdf]

|          | Motif I  | Motif II      | Motif III   | Motif VI       |  |
|----------|----------|---------------|-------------|----------------|--|
| HvV190S  | LQGRY 61 | WCVNGS QNA 46 | GKDRAI F 55 | DYDNFNS QHS 45 |  |
| NoRV2    | LQGRY 61 | WCVNGAENA 47  | GKDRAI F 55 | DYDDFNS HHS 45 |  |
| BfTV     | LQGRF 61 | WCVNGS ETK 46 | GKDRAI F 55 | DYDNFNS HHS 45 |  |
| TcV1     | LQGRG 60 | WCVNGAQNR 48  | GKSRAI F 55 | DYDDFNS HHS 45 |  |
| BbV1     | LRGRA 62 | WCVNGS QTA 51 | GKTRAIF 55  | DYDDFNS AHS 45 |  |
| HmTV1-17 | LQGRV 62 | WCVNGS HNA 50 | GKTRAIF 55  | DYDDFNS HHA 46 |  |

  

|          | Motif V                    | Motif IV    | Motif VII | Motif VIII |  |
|----------|----------------------------|-------------|-----------|------------|--|
| HvV190S  | TLMSGHRATTF TNS VLNAAYI 15 | HAGDDVYL 34 | EFLRL 9   | YLCR       |  |
| NoRV2    | TLMSGHRGTTTFVNS VLNAAYV 15 | HAGDDVYM 34 | EFLRS 9   | YLCR       |  |
| BfTV     | TLASGHRGTSFI NSLLNAAYI 15  | HAGDDVYI 34 | EFLRL 9   | YVAR       |  |
| TcV1     | TLMSGHRGTSFI NSVLNAAYI 15  | HAGDDAYM 34 | EFLRL 9   | YLCR       |  |
| BbV1     | TLMSGHRGTTFI NSI LNAAYL 15 | HTGDDVYL 34 | EFLRI 9   | YFAR       |  |
| HmTV1-17 | TLMMSGHRGTMFI NSVLNAVYI 15 | HAGDDVYA 34 | EFLRM 9   | YVCR       |  |

**Figure S1.** Multiple alignment of the amino acid sequences of RdRp domains of NoRV2 and other similar victorivirus, including HvV190S, BfTV, TcV1, BbV1 and HmTV1-17. Eight motifs, numbered I -VIII, that are conserved in the RdRp of these reference viruses were indicated.

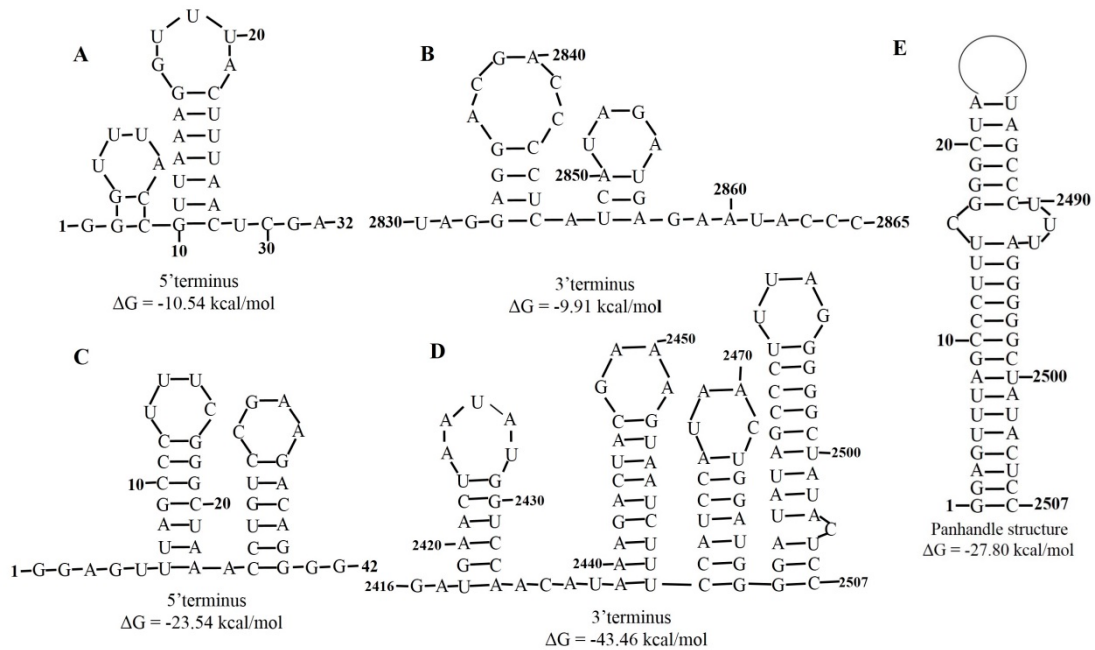

**Figure S2.** Potential predicted secondary structure of the 5'- and 3'-UTRs of NoMV1 (A,B), and NoMV2 (C,D). Panhandle structure formed by complementary sequences of the 5'- and 3'-terminal sequences of NoMV2 (E). The RNAs were folded and the free energy ( $\Delta G$ ) was estimated using RNA structure software.

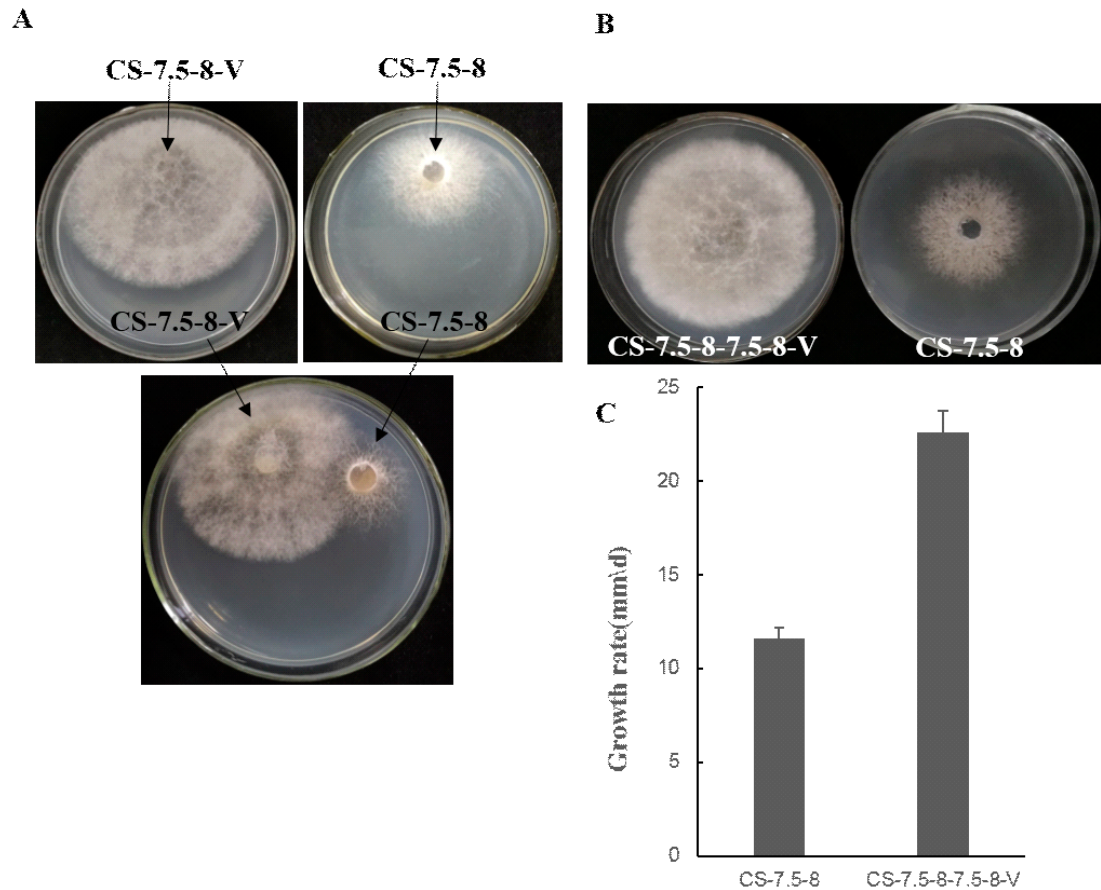

**Figure S3.** (A) Horizontal transmission of NoMV1 and NoMV2 from the donor strain CS-7.5-8-V to the recipient strain CS-7.5-8 by pairing culture. Recipient derivative isolates were obtained from edge of the recipient colony. (B) Colony morphology of CS-7.5-8 and the derivative isolate CS-7.5-8-7.5-8-V. (C) Average growth rates of CS-7.5-8 and CS-7.5-8-7.5-8-V when cultured on PDA for 4 days.

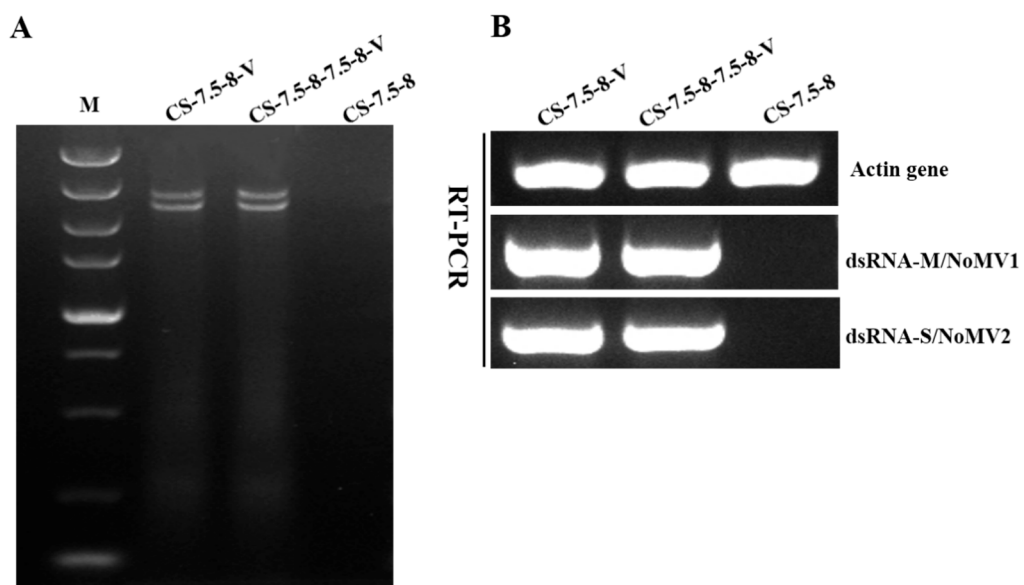

**Figure S4.** Detection of NoMV1 and NoMV2 in stains CS-7.5-8-V, CS-7.5-8-7.5-8-V, CS-7.5-8 by dsRNA extraction (A) and RT-PCR (B) using the primers showed in Table S3.

**Table S1.** Information of the primers used for virus detection.

| Primer names                    | Sequences                                                       |
|---------------------------------|-----------------------------------------------------------------|
| Actin gene (internal reference) | F:5'-GTCCCCATCTACGAGGGTTTC-3'<br>R: 5'-CGCTCTCAAGACCCAGGACAG-3' |
| dsRNA-L/NoRV2                   | F:5'-GACCCTAACACCATTATCCACC-3'<br>R:5'-GCGGCACCACCACCTATT-3'    |
| dsRNA-M/NoMV1                   | F:5'-TCACTGCTTGCTGCTACACT-3;<br>R:5'-GTCCTCCTACCCTCAACTCC-3'    |
| dsRNA-S/NoMV2                   | F:5'-CTGTAGGGTTAGCCAAGTTCC-3'<br>R:5'-AAATGAAGGTAGAGTGGGACA-3'  |
